# Supplementary material for: Eicosapentaenoic acid-enriched phospholipids alleviate glucose and lipid metabolism in spontaneously hypertensive rats with CD36 mutation: a precise nutrition strategy
Source: Royal Society of Chemistry journal article supplement (doi:10.1039/d2fo03016k), 2023-01-01

Table S1 Ingredients of the experimental diets

| Ingredients (g kg <sup>-1</sup> ) | Normal | SHR   | EPL   |
|-----------------------------------|--------|-------|-------|
| Potato starch                     | 349.5  | 349.5 | 349.5 |
| Casein                            | 200    | 200   | 200   |
| Sucrose                           | 100    | 100   | 100   |
| Soy oil                           | 50     | 50    | 46    |
| Lard                              | 200    | 200   | 184   |
| Cellulose                         | 50     | 50    | 50    |
| Mineral-salt mix                  | 35     | 35    | 35    |
| Vitamin mix                       | 10     | 10    | 10    |
| L-cystine                         | 3      | 3     | 3     |
| Choline bitartrate                | 2.5    | 2.5   | 2.5   |
| EPA-PL                            | 0      | 0     | 20    |

Table S2 Primer sequence

| Gene                            | Forward primer                | Reverse primer                 |
|---------------------------------|-------------------------------|--------------------------------|
| <i><math>\beta</math>-actin</i> | GGAGATTACTGCCCTGGCTCCTA       | GACTCATCGTACTCCTGCTTGCTG       |
| <i>ucp2</i>                     | TGAGTCTGTGGTCGGGTGGATG        | GCGGAGGAAGGAAGGCATGAAC         |
| <i>lipe</i>                     | GAGGCCTTTGAGATGCCACT          | AGATGAGCCTGGCTAGCACAG          |
| <i>lpl</i>                      | AAGGTCAGAGCCAAGAGAAGCA        | CCAGAAAAGTGAATCTTGACTTGGT      |
| <i>gk</i>                       | GTGGTGCTTTTGAGACCCGTT         | TTCGATGAAGGTGATTTGCA           |
| <i>gpd1</i>                     | GCCGACATCCTGATCTTTGT          | GCTCCCCAATCACTTCAGAG           |
| <i>cpt1a</i>                    | AGGACGGAGACAGTCAGTCAGTAA<br>C | GGAGGCAAGAGGATCAGAAGTTCAA<br>G |
| <i>srebp1c</i>                  | CGCTACCGTTCCTCTATCAATGAC      | AGTTTCTGGTTGCTGTGCTGTAAG       |
| <i>scd1</i>                     | TTCTTCGCCACTGACTTGCT          | ACGATGTTGAGATGTGAGACTGT        |
| <i>FoxO1</i>                    | GCATCCATGGACAACAACAG          | TGATGGTGCTAGCGTTTGAG           |
| <i>acox1</i>                    | GTATAAACTCTCCCGCTCCTG         | CCAGGTAGTAAAAGCCTTCAGC         |
| <i>pi3k</i>                     | CCTCTCCTTATAAAGCTCCTGGAA      | GATCACAATCAAGAAGCTGTCGTAA      |
| <i>irs1</i>                     | ATGTCGCCAGTGGGAGATT           | CTTCGGCAGTTGCGGTATA            |
| <i>irs2</i>                     | CAGCACCTACGCAAGCATCG          | CCGCAGCACTTTACTCTTTACC         |
| <i>ppar<math>\gamma</math></i>  | GTGATGGAAGACCACTCGC           | CCCACAGACTCGGCACTC             |
| <i>glut4</i>                    | ACTAAGAGCACCGAGACCAA          | CTGCCCCGAAAGAGTCTAAAG          |
| <i>akt</i>                      | TTCTACAACCAGGACCACGAGC        | TGATGCTGAGGAAGAACCGATG         |
| <i>ehhadh</i>                   | ATGGCCAGATTCAGGAATG           | TGCCACTTTTGTGATTTGC            |
| <i>cd36</i>                     | AGTTCTCAATCTGGCTGTGGC         | CACACCAACTGTGGTACTTATAGGA      |
| <i>ppara</i>                    | GAAGCAGATGACCTGGAAAGT         | AGCCTGGACAGCTCCCTAA            |
| <i>fasn</i>                     | CACAGCATTCAGTCCTATCCACAGA     | CACAGCCAACCAGATGCTTCA          |
| <i>acaa</i>                     | TCAGGTGAGTGATGGAGCAG          | CACACAGTAGACGGCCTGAC           |

Table S3 The effect of EPA-PL on general parameters

|                         | Normal     | SHR                     | EPL                     |
|-------------------------|------------|-------------------------|-------------------------|
| Food intake (g/day)     | 23.2±1.1   | 16.9±1.1 <sup>a</sup>   | 17.0±1.1 <sup>a</sup>   |
| Initial body weight (g) | 257.8±12.0 | 255.8±10.7 <sup>a</sup> | 266.3±11.5 <sup>a</sup> |
| Final body weight (g)   | 334.5±19.4 | 274.4±12.6 <sup>a</sup> | 293.4±2.7 <sup>a</sup>  |
| Liver (g)               | 9.4±0.9    | 8.2±0.3 <sup>a</sup>    | 8.6±0.6 <sup>a</sup>    |
| Perirenal fat (g)       | 6.6±1.1    | 4.3±0.1 <sup>a</sup>    | 4.7±0.3 <sup>a</sup>    |
| Subcutaneous Fat (g)    | 5.2±0.5    | 3.8±0.4 <sup>a</sup>    | 4.0±0.2 <sup>a</sup>    |
| epididymal fat (g)      | 5.7±0.6    | 4.4±0.1 <sup>a</sup>    | 4.6±0.3 <sup>a</sup>    |
| gastrocnemius muscle(g) | 4.9±0.4    | 3.4±0.1 <sup>a</sup>    | 3.6±0.1 <sup>a</sup>    |

Different letters indicated that significant difference at  $p < 0.05$  between EPL group and SHR group.

**Table S4 Sequence of CD36**

|      |            |            |             |            |            |             |                         |
|------|------------|------------|-------------|------------|------------|-------------|-------------------------|
| 0001 | AGCAAGTGCT | CTTCCTTGAT | TCTGCTGCAC  | GAGGAGGAGA | ATGGGCTGCG | ATCGGAACTG  | Normal rats<br>SHR rats |
| 0061 | TGGGCTCATT | ACTGGAGCCG | TTATTGGTGC  | TGTCCTGGCT | GTGTTTGGAG | GCATTCTCAT  |                         |
| 0121 | GCCGGTTGGA | GACCTACTCA | TTGAGAAGAC  | AATCAAAAGG | GAAGTTGTCC | TTGAAGAAGG  |                         |
| 0181 | AACCATTGCT | TTCAAAAAC  | GGGTGAAAAC  | GGGCACCACT | GTGTACAGAC | AGTTTTGGAT  |                         |
| 0241 | CTTTGACGTG | CAAAACCCAG | AGGAAGTGGC  | AAAGAATAGC | AGCAAGATCA | AGGTAAACA   |                         |
| 0301 | GAGAGTCTCT | TACACATACA | GAGTTCGTTA  | TTTAGCCAAG | GAAAGTATAA | CTCAGGACCC  |                         |
| 0361 | CAAAGACAGC | ACTGTCTCTT | TTGTACAACC  | CAATGGAGCC | ATCTTTGAGC | CTTCACTGTC  |                         |
| 0421 | TGTTGGAACA | GAGAATGACA | ACTTCACAGT  | TCTCAATCTG | GCTGTGGCAG | CTGCACCACA  |                         |
| 0481 | TATCTACACA | AACTCATTTG | TTCAAGGTGT  | GCTCAACAGC | CTTATCAAAA | AGTCCAAGTN  |                         |
| 0541 | TTCTANGTTN | CAAACACGAA | GTTTGAAGGA  | ACTCTTGTTG | GGTTACAAAG | ATCCATTCTT  |                         |
| 0601 | GAGTTTGGTT | CCATATCCTA | TAAGTACCAC  | AGTTGGTGTG | TTTTATCCTT | ACAATAACAC  |                         |
| 0661 | TGTAGATGGA | GTTTATAAAG | TTTTCAATGG  | AAAGGATAAC | ATAAGCAAAG | TTGCCATAAT  |                         |
| 0721 | TGATACCTAT | AAAGGAAAAA | GGAATTTGTC  | CTATTGAAAA | AGTTATTGCG | ACATGATTAA  |                         |
| 0781 | TGGCACAGAT | GCAGCCTCCT | TTCCACCTTT  | TGTTGAGAAG | TCTCAAACAC | TGAGGTTTTT  |                         |
| 0841 | TTCTCTGAC  | ATTGTCAGGT | CCATCTATGC  | TGTGTTTGAA | TCTGAAGTGA | ACCTTAAAGG  |                         |
| 0901 | AATCCCCGTA | TACAGATTTG | TTCTCCAGC   | CAACGCCTTT | GCCTCCCCAC | TCCAGAACCC  |                         |
| 0961 | AGACAACCAC | TGTTTCTGCA | CTGAAAAAGT  | AATCTCAAAT | AACTGTACGT | CGTATGGTGT  |                         |
| 1021 | GCTGGACATT | GGCAAGTGCA | AAGAAGGAAA  | GCCTGTGTAC | ATTTCTCTTC | CACATTTCTT  |                         |
| 1081 | ACATGCAAGT | CCTGATGTCT | CAGAACCCTAT | CGAAGGCTTG | AATCCTAACG | AAGATGAGCA  |                         |
| 1141 | TAGGACATAC | TTGGATGTGG | AACCCATAAC  | TGGATTCACT | CTACAGTTTG | CAAAACGACT  |                         |
| 1201 | GCAGGTCAAC | ATACTGGTCA | AGCCAGCTAG  | AAAAATAGAA | GCACTGAAGA | ATCTGAAGAG  |                         |
| 1261 | ACCTTACATT | GTACCTATAC | TGTGGCTAAA  | TGAGACTGGG | ACCATCGGCG | ATGAGAAAGC  |                         |
| 1321 | AGAAATGTTT | AGAAACCAAG | TGACCGGGAA  | AATAAAGCTC | CTGGGCCTGG | TTGAGATGGT  |                         |
| 1381 | CTTACTTGGT | GTTGGAGTAG | TGATGTTTGT  | TGCTTTTATG | ATTTCATACT | GTGCTTGCAG  |                         |
| 1441 | ATCTAAGAAT | GGAAAATAAG | TAAGTGCACA  | TCAAAGTATG | TATCATCTCA | TCAAAGTATG  |                         |
| 1501 | TTTTCATCTC | ATCAAGAAGG | GATTATACAT  | GAAAGCACAA | ATATACATTT | CTGCACATGT  |                         |
| 1561 | TGTTTAGCCA | GCTATAACGC | CTTAATATAT  | CCCTATTTTT | TATAACA    | TTTCTGCAG   |                         |
| 1621 | -TAGCCAG-T | ATA—GT-TT  | AA—TATCCC   | AA—T—GA-   | -T-A—G—    | TTGTAAAAGTA |                         |
| 1621 | AATTAAGAAG | CAAATGATGA | TTGAAATCAT  | TACCACAGGG | AAATGAGTAC | -AAAG—AAT   |                         |
| 1621 | TGAGAAGCAA | ATGATTATTG | AAATC       |            |            | AAGTATAATT  |                         |
| 1681 | TTTGTCCCAA | CTTAGACTTG | CTAATTTCT   |            |            |             |                         |

**Figure S1** Raw data of western blots in liver tissue.

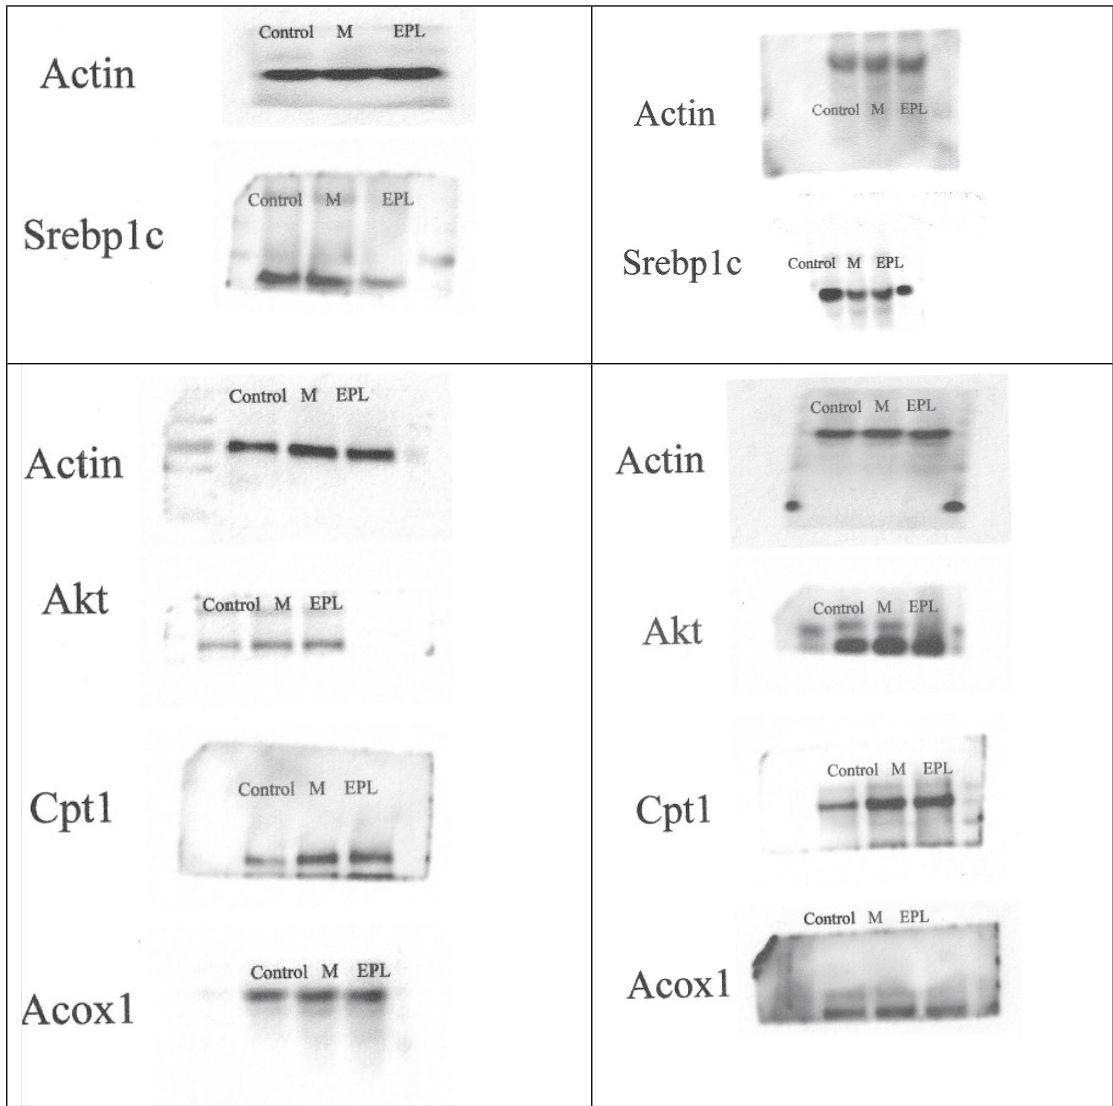

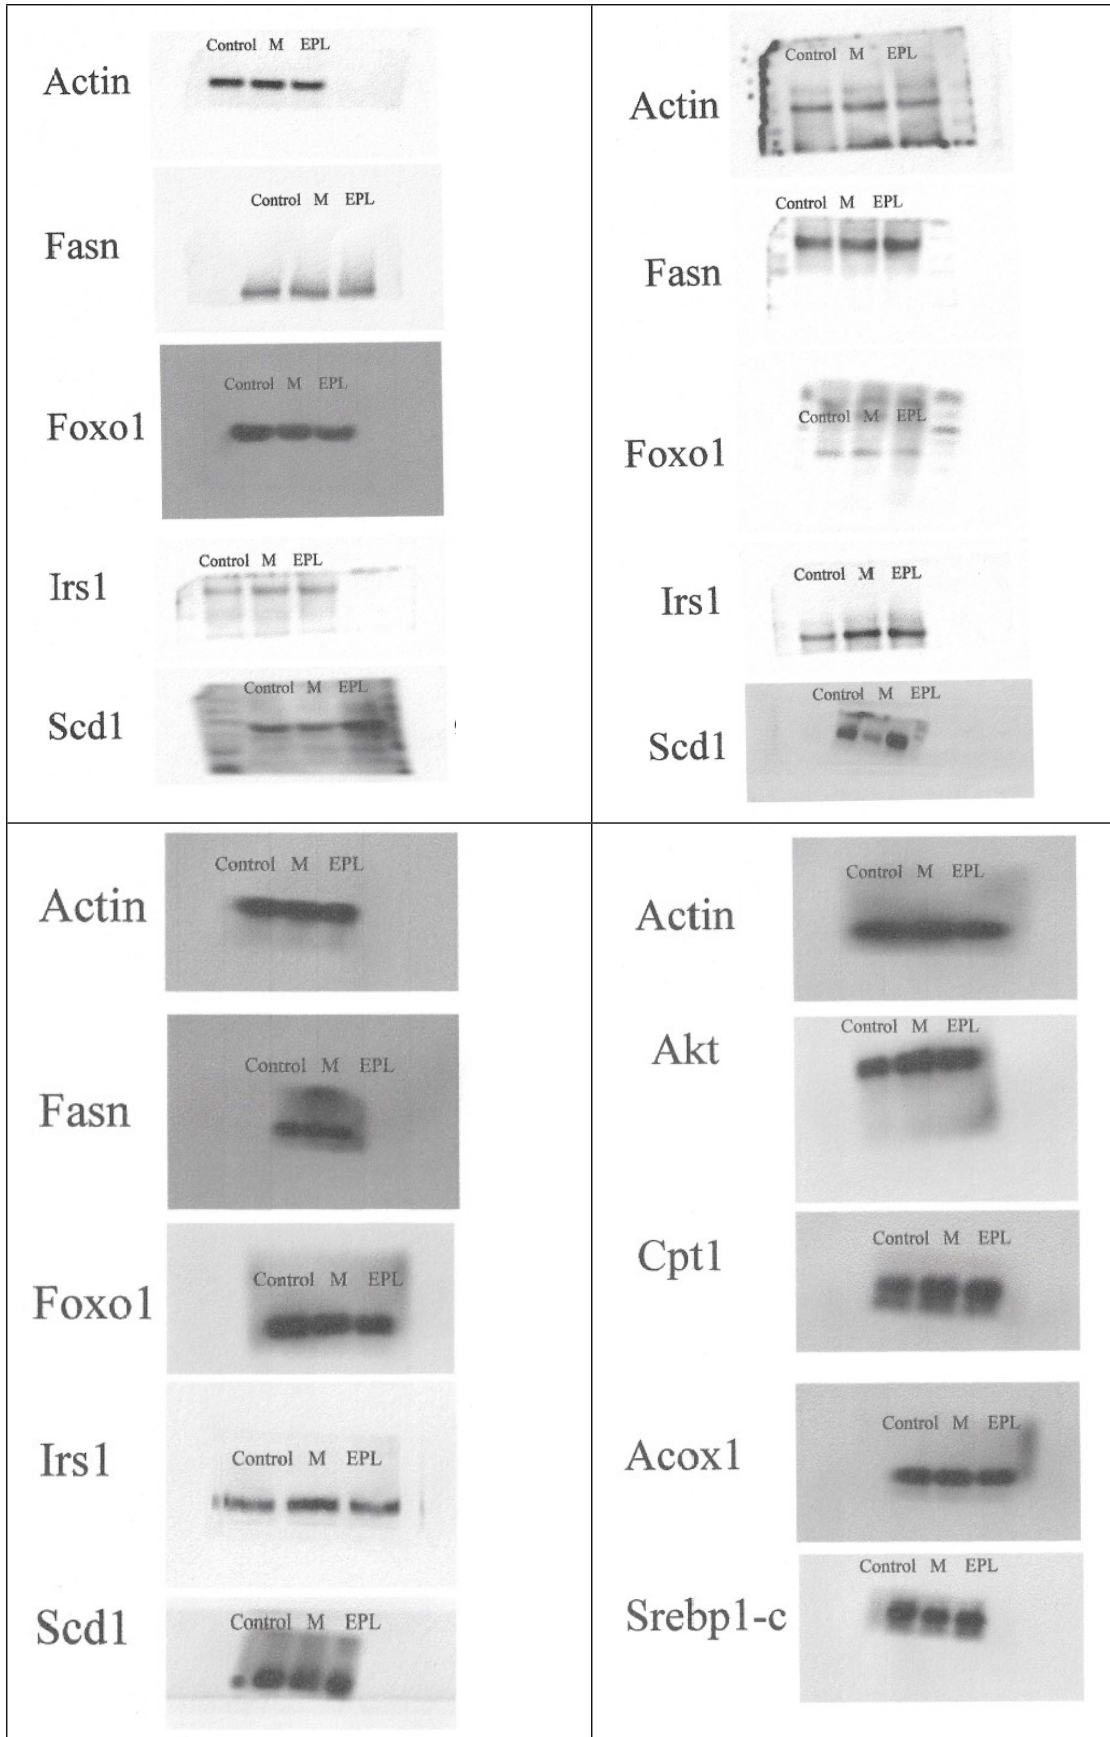

Supplement: d2fo03016k1.pdf [file d2fo03016k1.pdf]
